# Supplementary material
Source: PubMed Central journal article supplement (PMC4172634)
Supplement: NIHMS620522-supplement-Appendix_1.pdf [file NIHMS620522-supplement-Appendix_1.pdf]

## Appendix 1. Dietary and Supplemental Folate Intake of 232 Women in the Environment and Reproductive Health Study

A. Histogram of Total Folate Intake (in DFE)

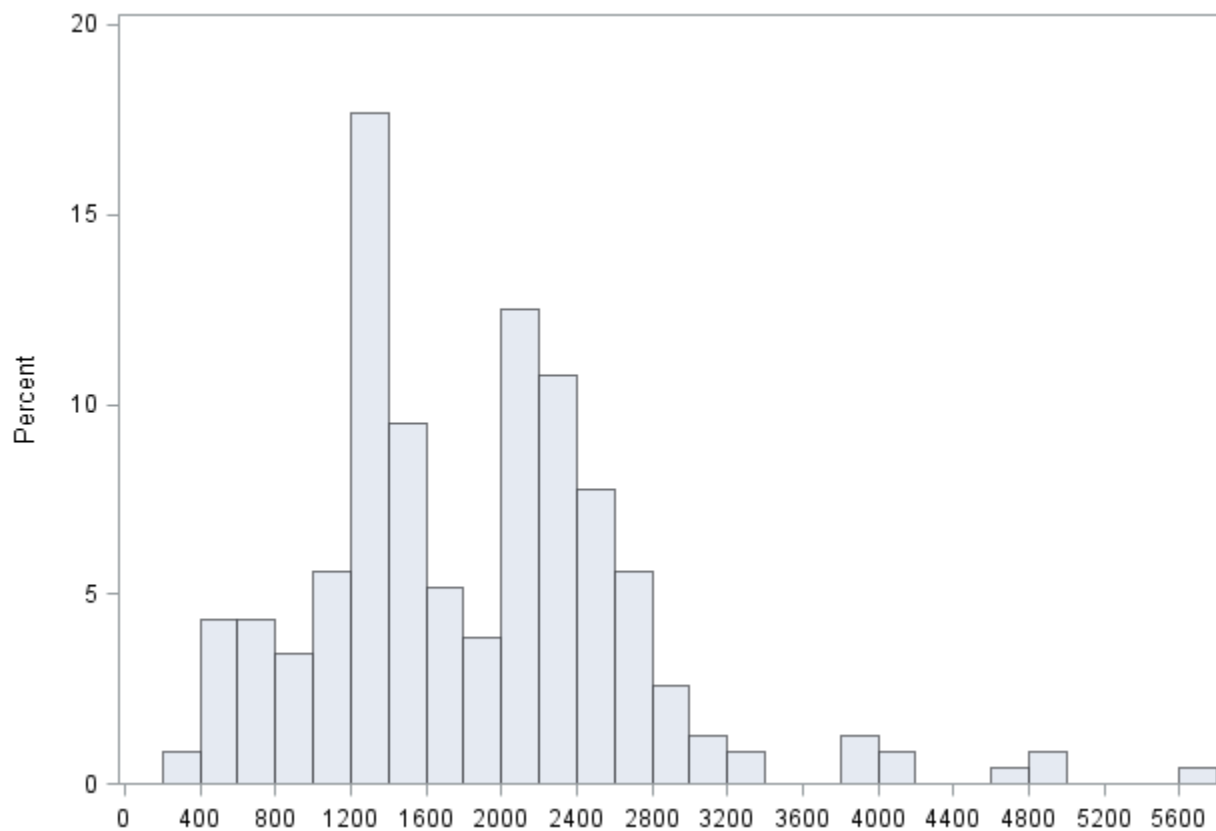

Gaskins AJ, Afeiche M, Wright DL, Toth TL, Williams PL, Gillman MW, et al. Dietary folate and reproductive success among women undergoing assisted reproduction. *Obstet Gynecol* 2014;124.

The authors provided this information as a supplement to their article.

© Copyright 2014 American College of Obstetricians and Gynecologists.

## B. Histogram of Supplemental Folate Intake

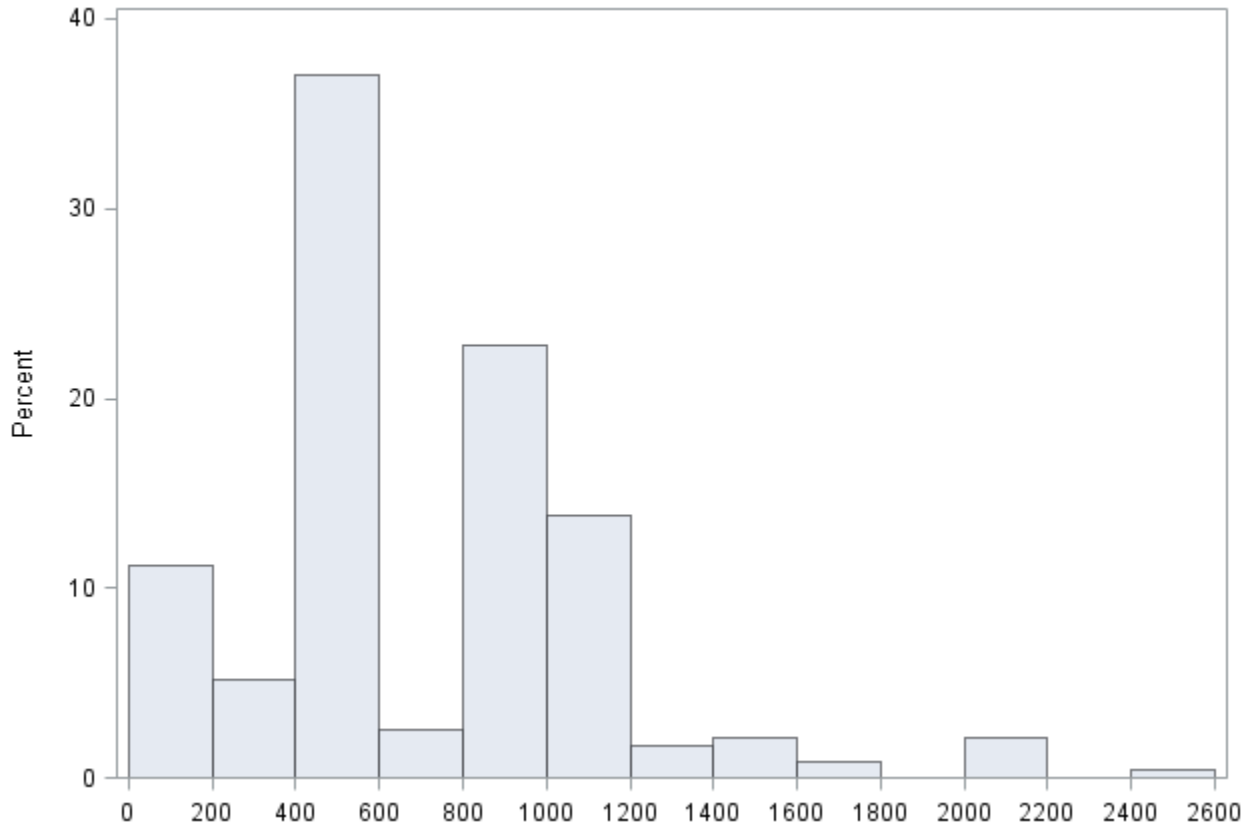

Gaskins AJ, Afeiche M, Wright DL, Toth TL, Williams PL, Gillman MW, et al. Dietary folate and reproductive success among women undergoing assisted reproduction. *Obstet Gynecol* 2014;124.

The authors provided this information as a supplement to their article.

© Copyright 2014 American College of Obstetricians and Gynecologists.
