# Supplementary material
Source: PubMed Central journal article supplement (PMC4172634)
Supplement: NIHMS620522-supplement-Appendix_2.pdf [file NIHMS620522-supplement-Appendix_2.pdf]

**Appendix 2. Associations Between Folate Intake and Live Birth Rates in 220 Women (322 Cycles With Embryo Transfer) From the Environment and Reproductive Health Study**

**A. Dietary Folate Equivalents and Live Birth Rate Per Embryo Transfer**

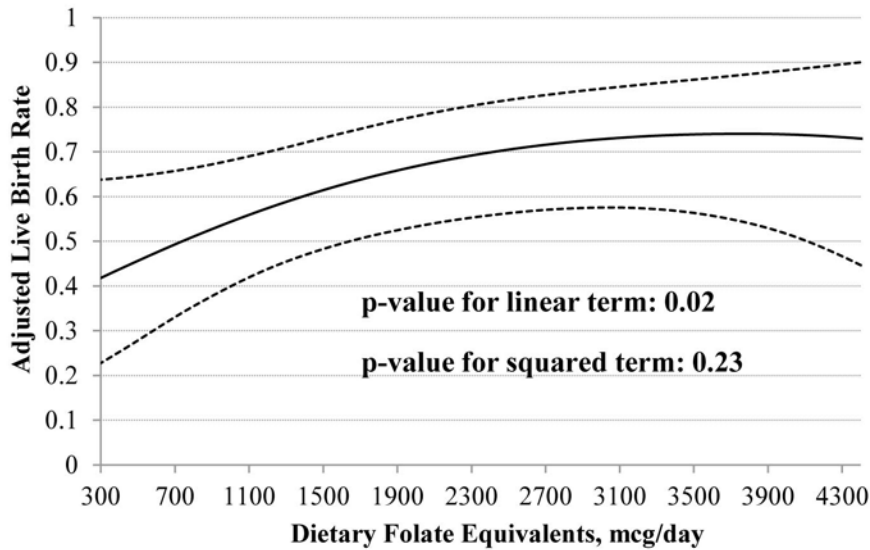

**B. Supplemental Folate and Live Birth Rate Per Embryo Transfer**

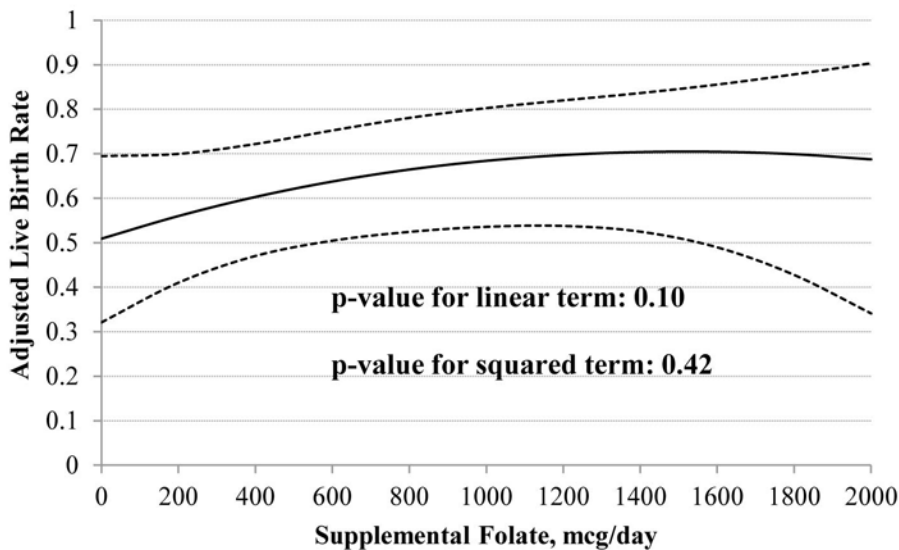

Gaskins AJ, Afeiche M, Wright DL, Toth TL, Williams PL, Gillman MW, et al. Dietary folate and reproductive success among women undergoing assisted reproduction. *Obstet Gynecol* 2014;124.

The authors provided this information as a supplement to their article.

© Copyright 2014 American College of Obstetricians and Gynecologists.
