# Supplementary material
Source: PubMed Central journal article supplement (PMC4172634)
Supplement: NIHMS620522-supplement-Appendix_3.pdf [file NIHMS620522-supplement-Appendix_3.pdf]

**Appendix 3. Association Between Dietary Folate and Fertilization Rates Stratified by In Vitro Fertilization and Intracytoplasmic Sperm Injection Among 222 Women (289 fresh Assisted Reproductive Technology Cycles With Egg Retrieval) From the Environment and Reproductive Health Study**

| Quartile (median, µg/day)    | Fertilization Rate         |                     |                      |
|------------------------------|----------------------------|---------------------|----------------------|
|                              | All cycles<br>n=289 cycles | IVF cycles<br>n=133 | ICSI cycles<br>n=155 |
|                              | Adjusted Mean (95% CI)     |                     |                      |
| <b>Total Folate (in DFE)</b> |                            |                     |                      |
| Q1 (<1262)                   | 0.70 (0.64, 0.75)          | 0.65 (0.54, 0.74)   | 0.75 (0.67, 0.81)    |
| Q2 (1262-1778)               | 0.69 (0.63, 0.74)          | 0.67 (0.57, 0.76)   | 0.69 (0.60, 0.77)    |
| Q3 ((1779-2352)              | 0.72 (0.67, 0.78)          | 0.73 (0.63, 0.81)   | 0.71 (0.62, 0.79)    |
| Q4 (>2352)                   | 0.76 (0.71, 0.81)          | 0.77 (0.67, 0.84)   | 0.76 (0.69, 0.82)    |
| P trend                      | 0.06                       | 0.04                | 0.65                 |
| <b>Supplemental Folate</b>   |                            |                     |                      |
| Q1 (<400)                    | 0.68 (0.62, 0.73)          | 0.62 (0.51, 0.71)   | 0.74 (0.65, 0.81)    |
| Q2 (400-543)                 | 0.70 (0.65, 0.75)          | 0.68 (0.59, 0.77)   | 0.70 (0.63, 0.78)    |
| Q3 (544-800)                 | 0.73 (0.67, 0.78)          | 0.74 (0.63, 0.82)   | 0.71 (0.63, 0.78)    |
| Q4 (>800)                    | 0.76 (0.71, 0.80)*         | 0.77 (0.69, 0.84)*  | 0.75 (0.68, 0.83)    |
| P trend                      | 0.03                       | 0.02                | 0.75                 |
| <b>Food Folate</b>           |                            |                     |                      |
| Q1 (<371)                    | 0.68 (0.62, 0.74)          | 0.60 (0.48, 0.71)   | 0.71 (0.63, 0.78)    |
| Q2 (372-436)                 | 0.74 (0.68, 0.79)          | 0.77 (0.67, 0.84)   | 0.75 (0.67, 0.82)    |
| Q3 (437-534)                 | 0.75 (0.69, 0.80)          | 0.75 (0.66, 0.83)   | 0.74 (0.65, 0.81)    |
| Q4 (>534)                    | 0.71 (0.65, 0.76)          | 0.69 (0.59, 0.77)   | 0.72 (0.64, 0.80)    |
| P trend                      | 0.78                       | 0.66                | 0.95                 |

Data are predicted marginal means adjusted for total calorie intake, age, BMI, race, smoking status, infertility diagnosis, and protocol type, unless otherwise specified.

ART, assisted reproductive technology; DFE, dietary folate equivalents; ICSI, intra-cytoplasmic sperm injection; IVF, in vitro fertilization. All analyses were run using generalized linear mixed models with random intercepts, binomial distribution, and logit link function.

\*Indicates a p-value < 0.05 comparing that quartile vs. first quartile.
