# Supplementary material
Source: PubMed Central journal article supplement (PMC4172634)
Supplement: NIHMS620522-supplement-Appendix_4.pdf [file NIHMS620522-supplement-Appendix_4.pdf]

**Appendix 4. Association Between Other Nutrients and Live Birth Rates in 232 Women (353 Initiated Cycles) From the Environment and Reproductive Health Study**

| <b>Quartile (median, µg/day)</b> | <b>Adjusted<br/>Live Birth Rate (95% CI)†</b> | <b>Adjusted + Folate<br/>Live Birth Rate (95% CI)‡</b> |
|----------------------------------|-----------------------------------------------|--------------------------------------------------------|
| <b>Vitamin B1</b>                |                                               |                                                        |
| Q1 (1.8)                         | 0.30 (0.20, 0.42)                             | 0.34 (0.22, 0.49)                                      |
| Q2 (2.9)                         | 0.42 (0.31, 0.53)                             | 0.43 (0.32, 0.55)                                      |
| Q3 (3.2)                         | 0.51 (0.52, 0.40)*                            | 0.49 (0.36, 0.61)                                      |
| Q4 (3.6)                         | 0.52 (0.40, 0.64)*                            | 0.47 (0.32, 0.62)                                      |
| P trend                          | 0.005                                         | 0.20                                                   |
| <b>Vitamin B2</b>                |                                               |                                                        |
| Q1 (2.3)                         | 0.27 (0.18, 0.38)                             | 0.30 (0.20, 0.44)                                      |
| Q2 (3.5)                         | 0.42 (0.30, 0.54)                             | 0.42 (0.31, 0.55)                                      |
| Q3 (4.3)                         | 0.52 (0.40, 0.64)*                            | 0.53 (0.40, 0.65)*                                     |
| Q4 (6.6)                         | 0.53 (0.41, 0.65)*                            | 0.47 (0.33, 0.62)                                      |
| P trend                          | 0.004                                         | 0.15                                                   |
| <b>Niacin (Vitamin B3)</b>       |                                               |                                                        |
| Q1 (25.3)                        | 0.29 (0.20, 0.40)                             | 0.35 (0.23, 0.48)                                      |
| Q2 (36.3)                        | 0.53 (0.40, 0.65)*                            | 0.53 (0.20, 0.65)*                                     |
| Q3 (41.2)                        | 0.51 (0.39, 0.63)*                            | 0.49 (0.37, 0.62)                                      |
| Q4 (48.4)                        | 0.42 (0.31, 0.54)                             | 0.36 (0.25, 0.49)                                      |
| P trend                          | 0.06                                          | 0.74                                                   |
| <b>Vitamin B6</b>                |                                               |                                                        |
| Q1 (2.4)                         | 0.29 (0.19, 0.40)                             | 0.32 (0.20, 0.46)                                      |
| Q2 (4.0)                         | 0.35 (0.25, 0.47)                             | 0.36 (0.26, 0.48)                                      |
| Q3 (5.2)                         | 0.58 (0.45, 0.70)*                            | 0.57 (0.45, 0.69)*                                     |
| Q4 (28.5)                        | 0.52 (0.40, 0.64)*                            | 0.48 (0.33, 0.63)                                      |
| P trend                          | 0.05                                          | 0.85                                                   |
| <b>Vitamin B12</b>               |                                               |                                                        |
| Q1 (7.0)                         | 0.30 (0.20, 0.41)                             | 0.32 (0.21, 0.46)                                      |
| Q2 (10.7)                        | 0.38 (0.28, 0.50)                             | 0.39 (0.28, 0.52)                                      |
| Q3 (13.8)                        | 0.47 (0.36, 0.59)*                            | 0.46 (0.35, 0.58)                                      |
| Q4 (20.7)                        | 0.59 (0.46, 0.70)*                            | 0.56 (0.40, 0.70)                                      |
| P trend                          | 0.001                                         | 0.05                                                   |
| <b>Iron</b>                      |                                               |                                                        |
| Q1 (12.1)                        | 0.35 (0.24, 0.47)                             | 0.40 (0.28, 0.54)                                      |
| Q2 (26.9)                        | 0.40 (0.29, 0.52)                             | 0.44 (0.32, 0.57)                                      |
| Q3 (38.7)                        | 0.48 (0.36, 0.61)                             | 0.45 (0.32, 0.58)                                      |
| Q4 (45.8)                        | 0.51 (0.39, 0.63)                             | 0.43 (0.29, 0.58)                                      |
| P trend                          | 0.04                                          | 0.75                                                   |

All analyses were run using generalized linear mixed models with random intercepts, binomial distribution, and logit link function. The spearman correlation coefficients for dietary folate equivalents and the selected nutrients were 0.77 (vitamin B1), 0.71 (vitamin B2), 0.63 (niacin), 0.78 (vitamin B6), 0.76 (vitamin B12), and 0.74 (iron).

\*Indicates a p-value < 0.05 comparing that quartile vs. first quartile.

Gaskins AJ, Afeiche M, Wright DL, Toth TL, Williams PL, Gillman MW, et al. Dietary folate and reproductive success among women undergoing assisted reproduction. *Obstet Gynecol* 2014;124.

The authors provided this information as a supplement to their article.

© Copyright 2014 American College of Obstetricians and Gynecologists.

†Data are predicted marginal means adjusted for total calorie intake, age, BMI, race, smoking status, infertility diagnosis, and protocol type, unless otherwise specified.

‡Data are predicted marginal means adjusted for total calorie intake, age, BMI, race, smoking status, infertility diagnosis, protocol type, and dietary folate equivalents, unless otherwise specified.

Gaskins AJ, Afeiche M, Wright DL, Toth TL, Williams PL, Gillman MW, et al. Dietary folate and reproductive success among women undergoing assisted reproduction. *Obstet Gynecol* 2014;124.

The authors provided this information as a supplement to their article.

© Copyright 2014 American College of Obstetricians and Gynecologists.

Page 2 of 2
